# Supplementary material for: An immunosensor for the detection of N-(carboxymethyl)lysine - a diabetic biomarker
Source: Royal Society of Chemistry journal article supplement (doi:10.1039/d5ra00968e), 2025-01-01
Supplement: d5ra00968e1.pdf [file d5ra00968e1.pdf]

## **An Immunosensor for the Detection of N-(carboxymethyl)lysine - A Diabetic Biomarker**

**Priyanga Kumar<sup>a,b</sup>, Noel Nesakumar<sup>c</sup>, Srinivasan Vedantham<sup>c,d</sup> and John Bosco Balaguru Rayappan<sup>a,b,\*</sup>**

*<sup>a</sup>Centre for Nanotechnology & Advanced Biomaterials (CeNTAB), SASTRA Deemed University, Thanjavur - 613 401, India*

*<sup>b</sup>School of Electrical & Electronics Engineering (SEEE), SASTRA Deemed University, Thanjavur - 613 401, India*

*<sup>c</sup>School of Chemical & Biotechnology (SCBT), SASTRA Deemed University, Thanjavur - 613 401, India*

*<sup>d</sup>DifGen Pharmaceuticals Private Ltd. Hyderabad, India*

### **Materials and methods**

Urea, sodium chloride (NaCl), carboxymethyl-lysine, monoclonal CML antigen, 1-ethyl-3-(3-dimethyl-aminopropyl) carbodiimide (EDC), N-hydroxysuccinimide (NHS), potassium hydroxide, methylglyoxal, glucose, glutamic acid, fructose, ascorbic acid, glutathione, uric acid, potassium hexacyanoferrate (III) [ $K_3Fe(CN)_6$ ], ringer lactate, and sodium hydroxide (NaOH) were procured from Sigma-Aldrich, USA. Paracetamol and orange peels were acquired from local vendors.

### **Instrumentation**

X-ray diffraction (XRD) study was examined with the D8 Focus XRD, Bruker, Germany. The investigation was obtained at a diffraction angle from  $10^\circ$ - $80^\circ$  with wavelength of 1.5418 Å. UV-Vis spectrophotometer (Perkin Elmer Lambda 25, USA) was used to obtain the absorption spectra of CQDs in the range of 200-600 nm wavelength. The functional groups of as prepared CQDs materials were characterized using Fourier-Transform Infrared Spectroscopy (FT-IR, Spectrum 100, Perkin Elmer, USA).

The voltammetric experiments have been carried out using the Potentiostat CHI660E (CH Instruments Inc., USA). The CV and DPV experimentations were carried out in a 10 mL glass

cell equipped with a three-electrode arrangement of Ag/AgCl (saturated in KCl) as the reference electrode, platinum wire as the auxiliary electrode, and surface modified glassy carbon as the working electrode.

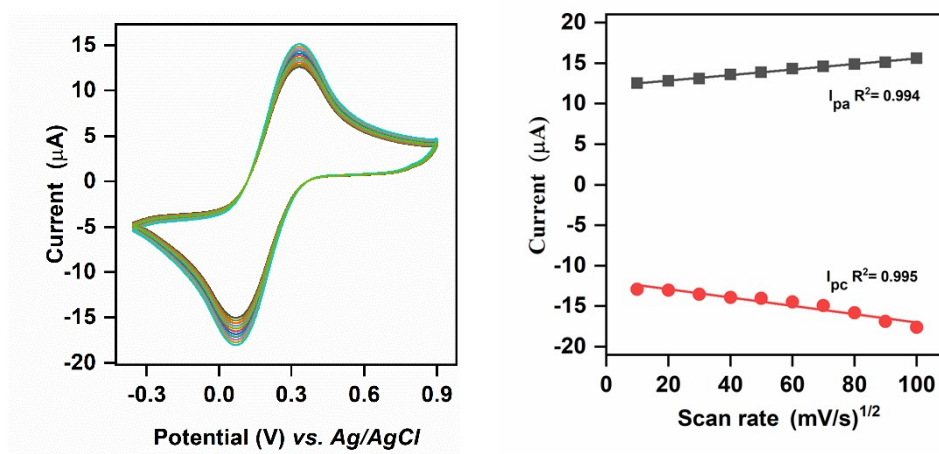

**Figure**

**S1.**

Cyclic

voltammetry current response on the effect of variation scan rate of GCE/CQDs/anti-CML/NHS-EDC, and its linear calibration plot.
